# Supplementary material
Source: Research Square preprint supplement (doi:10.21203/rs.3.rs-9408533/v1)
Supplement: Supplementary file 1 [file fc418d85109df549ee6f847d.docx]

• Heavy‑metal concentrations across geomorphic units of the Chaldoran region are predominantly controlled by geogenic factors, especially basaltic and Quaternary parent materials.

• Depth‑oriented sampling reveals stable vertical patterns, with no evidence of anthropogenic contamination across soil horizons.

• Pollution indices (EI, I_geo, PI, PLI) consistently classify all geomorphic units as non‑polluted to slightly polluted.

• Multivariate analyses confirm strong correlations among major elements (Fe, Al, Ti, Si), indicating shared lithogenic origins.

• The study provides essential baseline values for soil‑quality assessment in cold semi‑arid regions of Iran.
